# Supplementary material
Source: PubMed Central journal article supplement (PMC4939551)
Supplement: mmc1.pdf [file mmc1.pdf]

**Biophysical Journal, Volume 110**

**Supplemental Information**

**A New Method for Determining Structure Ensemble: Application to a  
RNA Binding Di-Domain Protein**

**Wei Liu, Jingfeng Zhang, Jing-Song Fan, Giancarlo Tria, Gerhard Grüber, and Daiwen  
Yang**

## Supporting Information

Wei Liu<sup>1</sup>, Jingfeng Zhang<sup>1,§</sup>, Jing-Song Fan<sup>1</sup>, Giancarlo Tria<sup>2</sup>, Gerhard Grüber<sup>2</sup>, and Daiwen Yang<sup>1,\*</sup>

<sup>1</sup>Department of Biological Sciences, National University of Singapore, 14 Science Drive 4, Singapore 117543

<sup>2</sup>Nanyang Technological University, School of Biological Sciences, 60 Nanyang Drive, Singapore 637551

<sup>§</sup>Present address: State Key Laboratory of Magnetic Resonance and Atomic and Molecular Physics, Wuhan Institute of Physics and Mathematics, The Chinese Academy of Sciences, 430071 Wuhan, China

\*To whom correspondence should be addressed, email: [dbsydw@nus.edu.sg](mailto:dbsydw@nus.edu.sg), phone: 65-65161014

**Table S1.** Difference between calculated and reference spin-label conformers

| Labeling site | Average difference for fixed population (Å) <sup>a</sup> | Average difference for unfixed population (Å) <sup>a</sup> |
|---------------|----------------------------------------------------------|------------------------------------------------------------|
| M107          | 0.8                                                      | 2.0                                                        |
| H123          | 0.5                                                      | 1.3                                                        |
| N148          | 1.0                                                      | 1.4                                                        |
| S190          | 0.3                                                      | 1.0                                                        |
| N218          | 0.5                                                      | 2.4                                                        |

<sup>a</sup>The average difference between calculated and reference spin-label conformers ( $\Delta$ ) is given by:

$\Delta = \sum_i p_i \times D_i$ , where  $p_i$  is the population of the calculated  $i^{\text{th}}$  spin-label conformer,  $D_i$  is the distance between the calculated  $i^{\text{th}}$  conformer and its closest reference (or input) conformer. Note that one spin-label conformer is represented by one point in space.

**Table S2.** NMR data and structure determination details for PubRRM12

---

|                                                                       |                     |
|-----------------------------------------------------------------------|---------------------|
| <b>All NOE distance restraints<sup>a</sup></b>                        | 1967                |
| Intra-residue                                                         | 478                 |
| Sequential ( $ i-j  = 1$ )                                            | 610                 |
| Medium-range ( $1 <  i-j  < 5$ )                                      | 284                 |
| Long-range ( $ i-j  \geq 5$ )                                         | 595                 |
| <b>Hydrogen bonds restraints</b>                                      | 96                  |
| <b>Dihedral angle restraints(<math>\phi, \psi</math>)<sup>b</sup></b> | 299                 |
| <b>Energy statistics</b>                                              |                     |
| $E_{\text{noe}}$                                                      | 66.79±0.83          |
| $E_{\text{dih}}$                                                      | 3.78±0.50           |
| <b>Deviations from idealized covalent geometry<sup>c</sup></b>        |                     |
| RMSD of bond lengths (Å)                                              | 0.0022±0.0000       |
| RMSD of bond angles (°)                                               | 0.313±0.005         |
| RMSD of improper angles (°)                                           | 0.302±0.006         |
| <b>Deviations from experimental restraints</b>                        |                     |
| RMSD of distance restraints (Å)                                       | 0.0255±0.0005       |
| RMSD of dihedral angle restraints (°)                                 | 0.45±0.03           |
| <b>Ramachandran plot analysis (%)<sup>d</sup></b>                     |                     |
| Residues in allowed region                                            | 97.2%               |
| Residues in generally allowed regions                                 | 2.5%                |
| Residues in disallowed regions                                        | 0.3%                |
| <b>Average RMSD from mean structure (Å)<sup>e</sup></b>               | RRM1 RRM2           |
| Heavy atoms                                                           | 1.22±0.15 1.28±0.16 |
| Backbone atoms (N, CA, C',O)                                          | 0.28±0.06 0.45±0.17 |

---

- a The distance restraints were obtained by classifying NOE cross peaks into three categories: strong (1.8–2.9 Å), medium (1.8–3.5 Å), and weak (1.8–5.0 Å).
- b Dihedral angles of backbone  $\phi$  and  $\psi$  were predicted by TALOS using the chemical shifts of  $C\alpha$ ,  $C\beta$ ,  $H\alpha$ , N, and HN.
- c Twenty lowest-energy conformers with no NOE violations greater than 0.3 Å and no torsion angle violations greater than  $3^\circ$  were selected from 100 conformers to represent the NMR ensembles.
- d Calculated with PROCHECK-NMR.
- e Calculated with MOLMOL over secondary structure regions  $\beta$ 1 (75-80),  $\alpha$ 1 (88-96),  $\beta$ 2 (103-108),  $\beta$ 3 (116-121),  $\alpha$ 2 (125-134), and  $\beta$ 4 (146-149) for N-terminal RRM1 domain;  $\beta$ 5 (162-167),  $\alpha$ 3(175-182),  $\beta$ 6 (190-195),  $\beta$ 7 (206-210),  $\alpha$ 4 (213-223), and  $\beta$ 8 (234-237) for C-terminal RRM2 domain.

**Table S3.** SAXS-data collection and scattering derived parameters of PubRRM12**Data collection parameters**

|                                            |                                                 |
|--------------------------------------------|-------------------------------------------------|
| Instrument (source)                        | Bruker NanoStar equipped with MetalJet eXcillum |
| Instrument (detector)                      | VÅNTEC-2000                                     |
| Beam geometry                              | 100 $\mu\text{m}$ slit                          |
| Wavelength ( $\text{\AA}$ )                | 1.3414                                          |
| s range ( $\text{\AA}^{-1}$ )              | 0.016-0.4                                       |
| Exposure time (min)                        | 20 (5 frames x 4min)                            |
| Concentration range (mg ml <sup>-1</sup> ) | 0.5-2                                           |
| Temperature (K)                            | 288.15                                          |

**Structural parameters**

|                                                          |                         |
|----------------------------------------------------------|-------------------------|
| I(0) ( $\text{cm}^{-1}$ ) [from P(r)]                    | 76.81 $\pm$ 0.97        |
| R <sub>g</sub> ( $\text{\AA}$ ) [from P(r)]              | 19.35 $\pm$ 0.23        |
| I(0) ( $\text{cm}^{-1}$ ) (from Guinier)                 | 75.40 $\pm$ 1.55        |
| R <sub>g</sub> ( $\text{\AA}$ ) (from Guinier)           | 18.66 $\pm$ 0.53        |
| D <sub>max</sub> ( $\text{\AA}$ )                        | 60 $\pm$ 5              |
| Porod volume estimate ( $\text{\AA}^3$ )                 | $\sim$ 23200 $\pm$ 3000 |
| Dammif excluded volume ( $\text{\AA}^3$ )                | $\sim$ 31000 $\pm$ 3000 |
| Dry volume calculated from sequence ( $\text{\AA}^3$ ) ‡ | $\sim$ 23227            |

**Molecular mass determination**

|                                                               |            |
|---------------------------------------------------------------|------------|
| Calculated monomeric <i>MM</i> (kDa) from sequence*           | $\sim$ 19  |
| Molecular mass <i>MM</i> (kDa) [from <i>Porod invariant</i> ] | 15 $\pm$ 3 |
| Molecular mass <i>MM</i> (kDa) [from <i>excluded volume</i> ] | 16 $\pm$ 3 |

**Software employed**

|                                  |         |
|----------------------------------|---------|
| Primary data reduction           | SAXS    |
| Data processing                  | PRIMUS  |
| <i>Ab initio</i> analysis        | DAMMIN  |
| Validation and averaging         | DAMAVER |
| Computation of model intensities | CRYSOL  |
| Flexibility                      | EOM 2.0 |
| 3D graphics representations      | PyMOL   |

\* [http://web.expasy.org/compute\\_pi/](http://web.expasy.org/compute_pi/)‡ <http://www.basic.northwestern.edu/biotools/proteincalc.html>

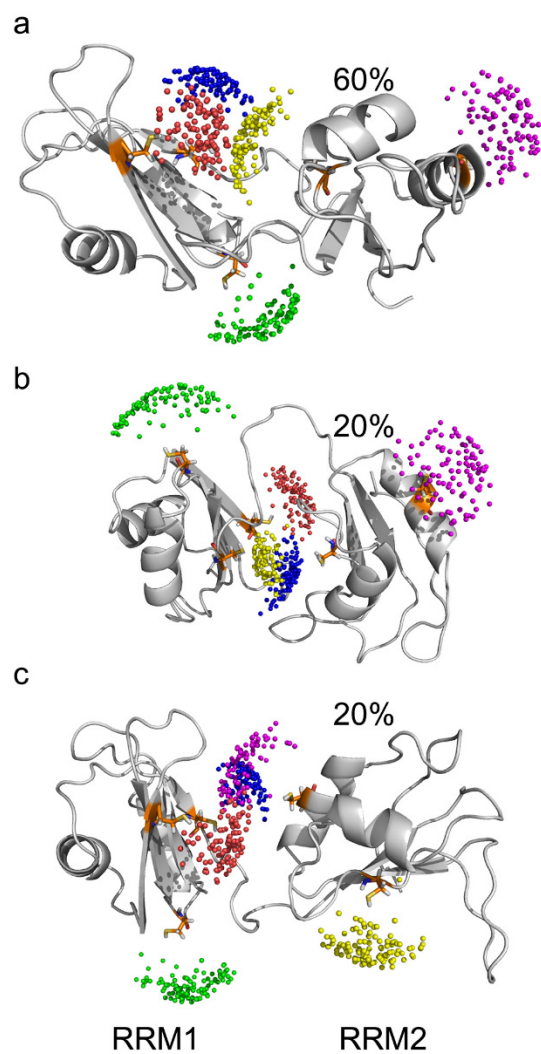

Figure S1. Three predefined structures of PubRRM12 (with populations of 60%, 20%, and 20%), which were used in PRE synthesis. 100 positions of the free electron in each MTSL are shown as small spheres. Red, green, blue, yellow, magenta spheres represent the MTSL at residues M107, H123, N148, S190, and N218, respectively.

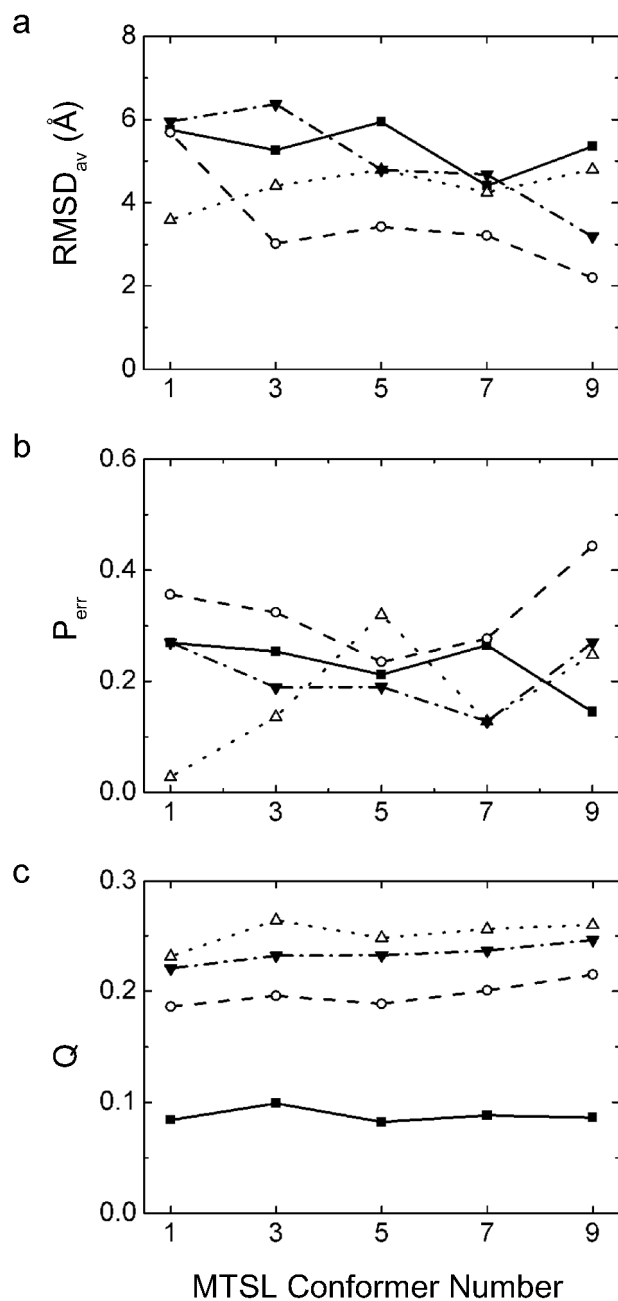

Figure S2. Influence of the number of pseudo MTSL conformers on calculated protein structure ensembles as revealed from four groups of synthetic PRE data (■, without error; ○, error set 1; △, error set 2; ▼, error set 3). (a) Structure difference. (b) Population difference:  $P_{err} = \sum_i |P_i - Pc_i|$ , where  $P_i$  ( $Pc_i$ ) is the population of the  $i^{\text{th}}$  reference (calculated) conformer. (c) Q factor values.



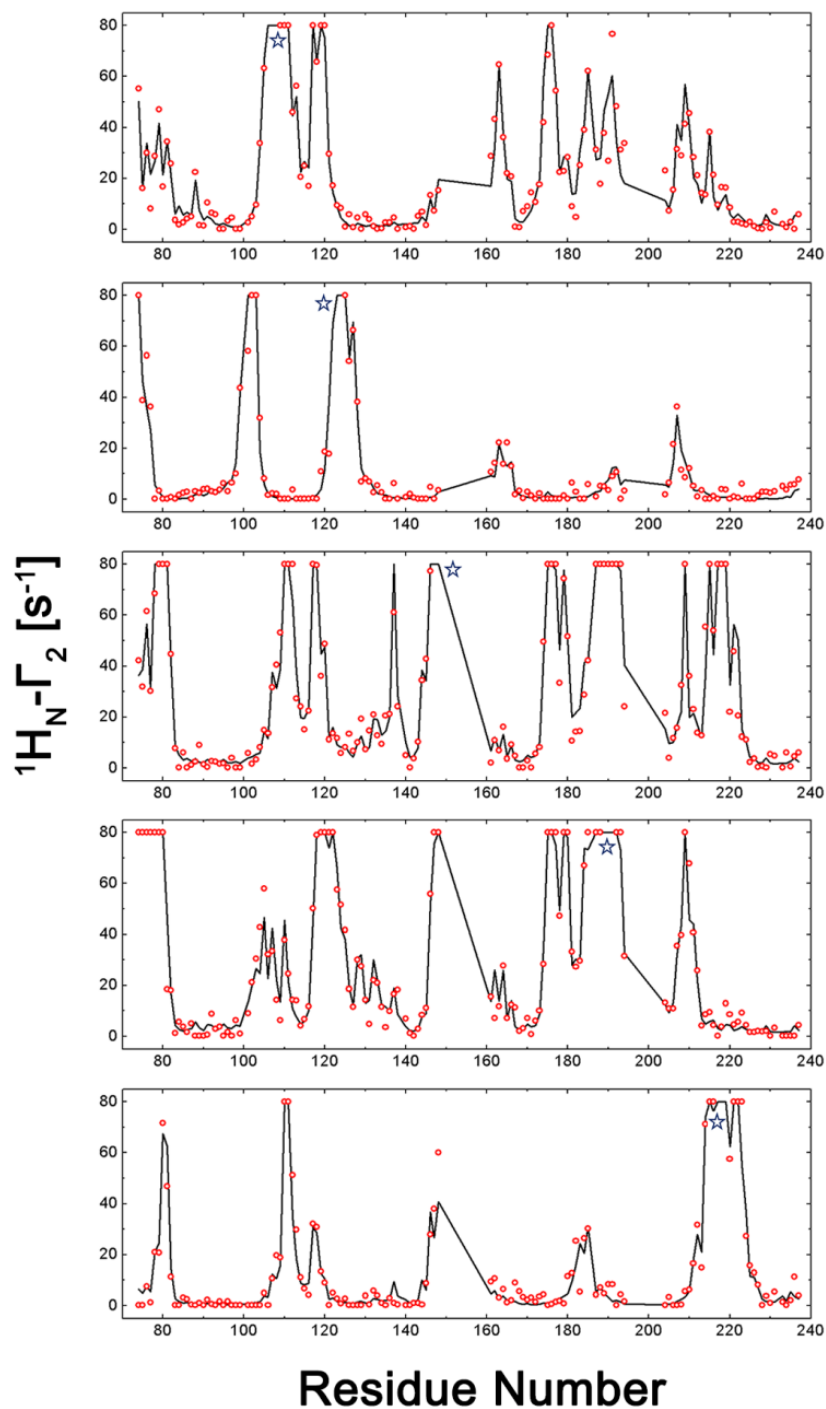

Figure S3. Comparison of synthetic PRE data without errors ( $\circ$ ) and calculated PRE data (black line) when 3 pseudo MTSL conformers were used to represent 100 equally populated conformers. Spin labels are located at respective residues M107, H123, N148, S190, and N218, of which locations are indicated by stars. Data from residues in the linker (150-160) and flexible region in RRM2 (195-203) were not used in the calculations.

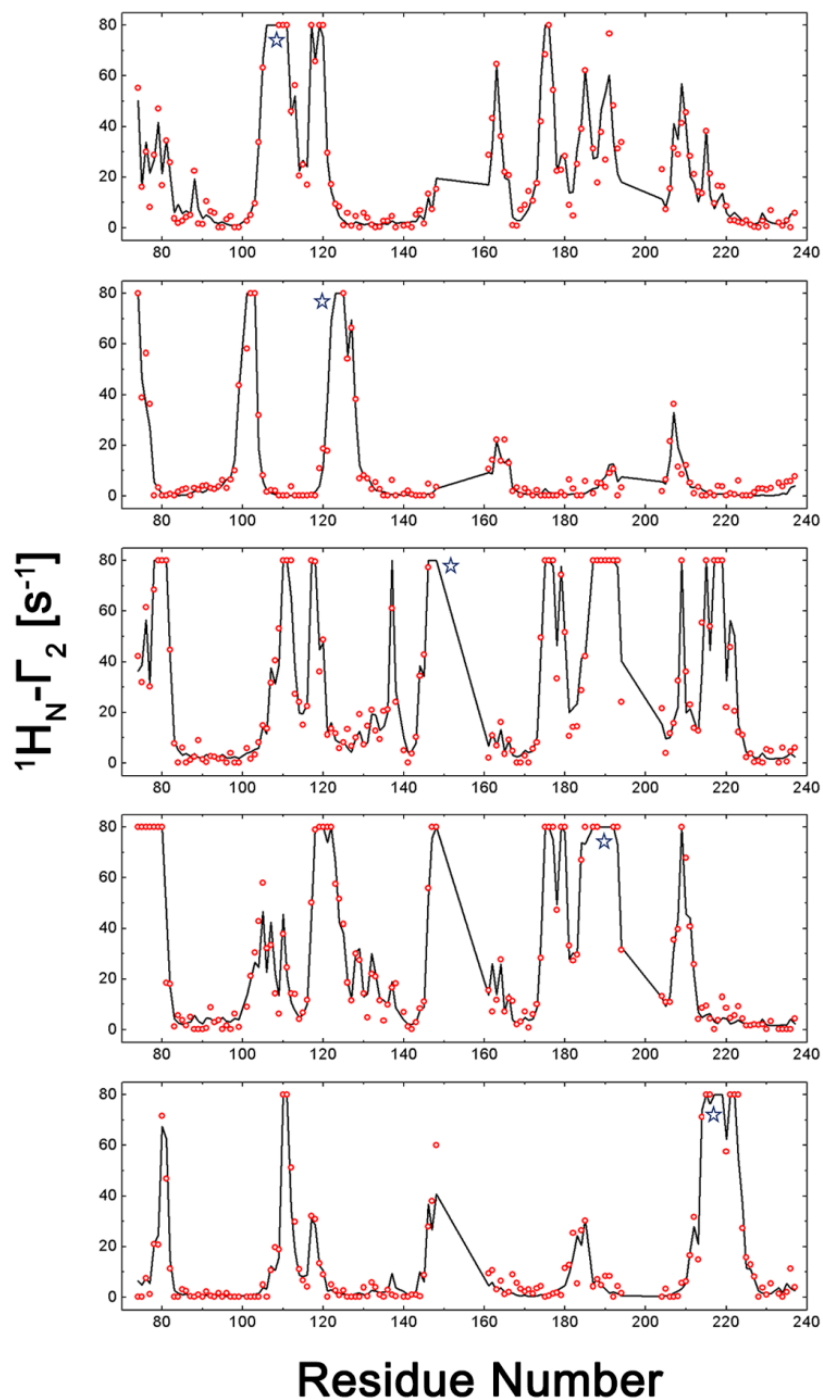

Figure S4. Comparison of synthetic PRE data with error set 1 ( $\circ$ ) and calculated PRE data (black line) when 3 pseudo MTSL conformers were used to represent 100 equally populated conformers. Spin labels are located at respective residues M107, H123, N148, S190, and N218, of which locations are indicated by stars. Data from residues in the linker (150-160) and flexible region in RRM2 (195-203) were not used in the calculations.

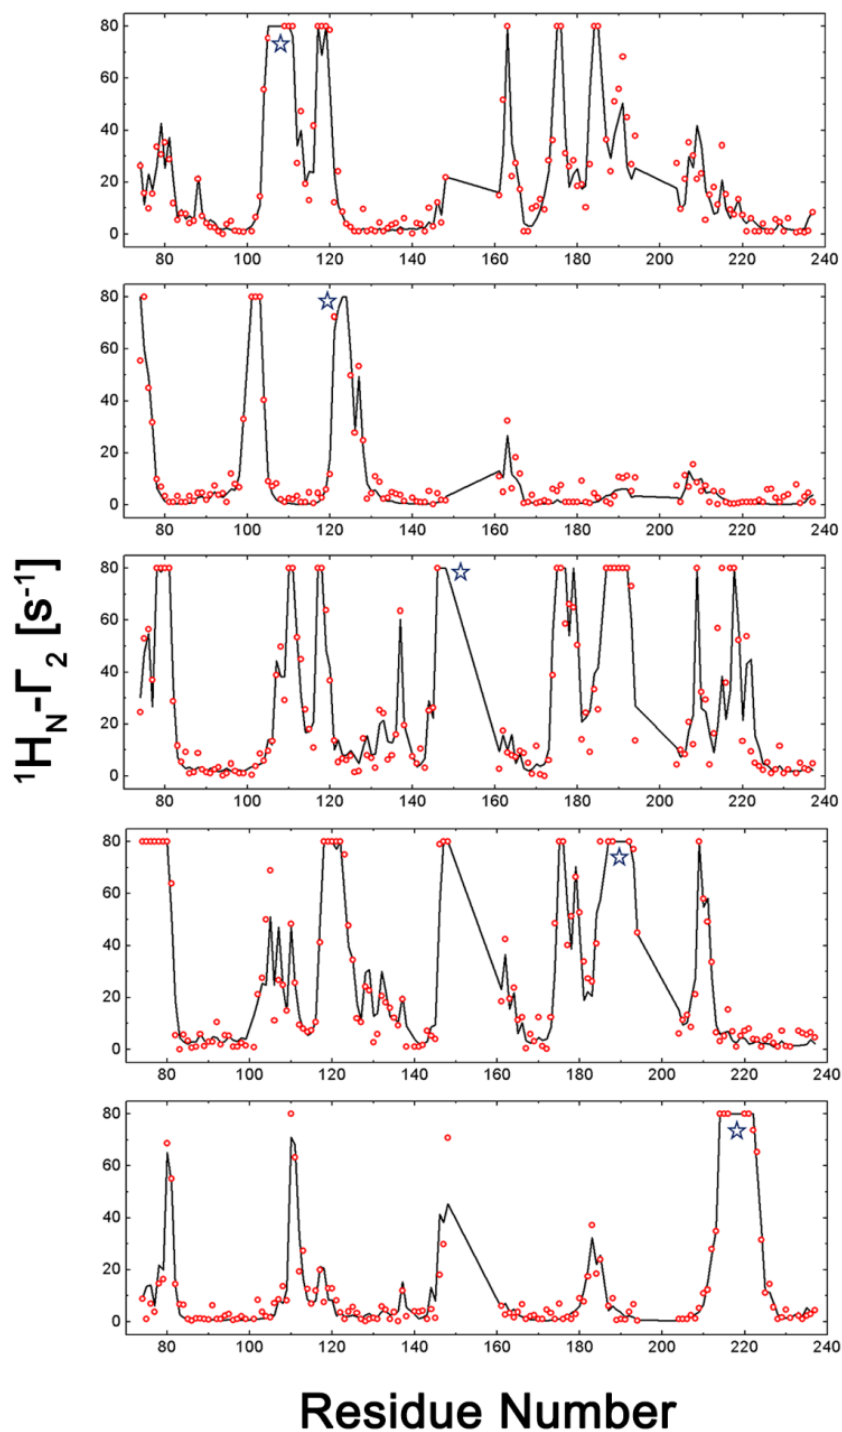

Figure S5. Comparison of synthetic PRE data with error set 2 ( $\circ$ ) and calculated PRE data (black line) when 3 pseudo MTSL conformers were used to represent 100 equally populated conformers. Spin labels are located at respective residues M107, H123, N148, S190, and N218, of which locations are indicated by stars. Data from residues in the linker (150-160) and flexible region in RRM2 (195-203) were not used in the calculations.

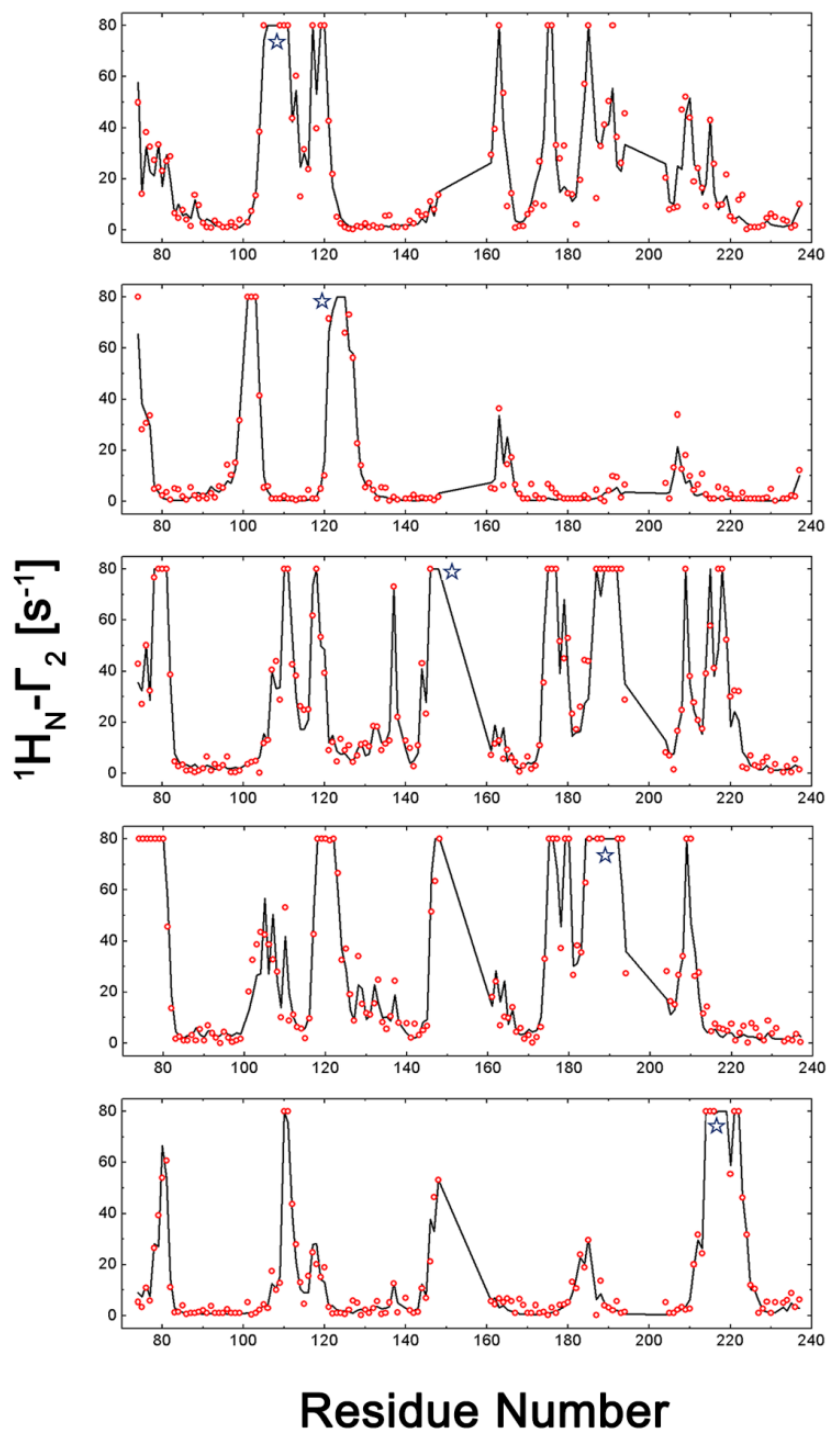

Figure S6. Comparison of synthetic PRE data with error set 3 ( $\circ$ ) and calculated PRE data (black line) when 3 pseudo MTSL conformers were used to represent 100 equally populated conformers. Spin labels are located at respective residues M107, H123, N148, S190, and N218, of which locations are indicated by stars. Data from residues in the linker (150-160) and flexible region in RRM2 (195-203) were not used in the calculations.

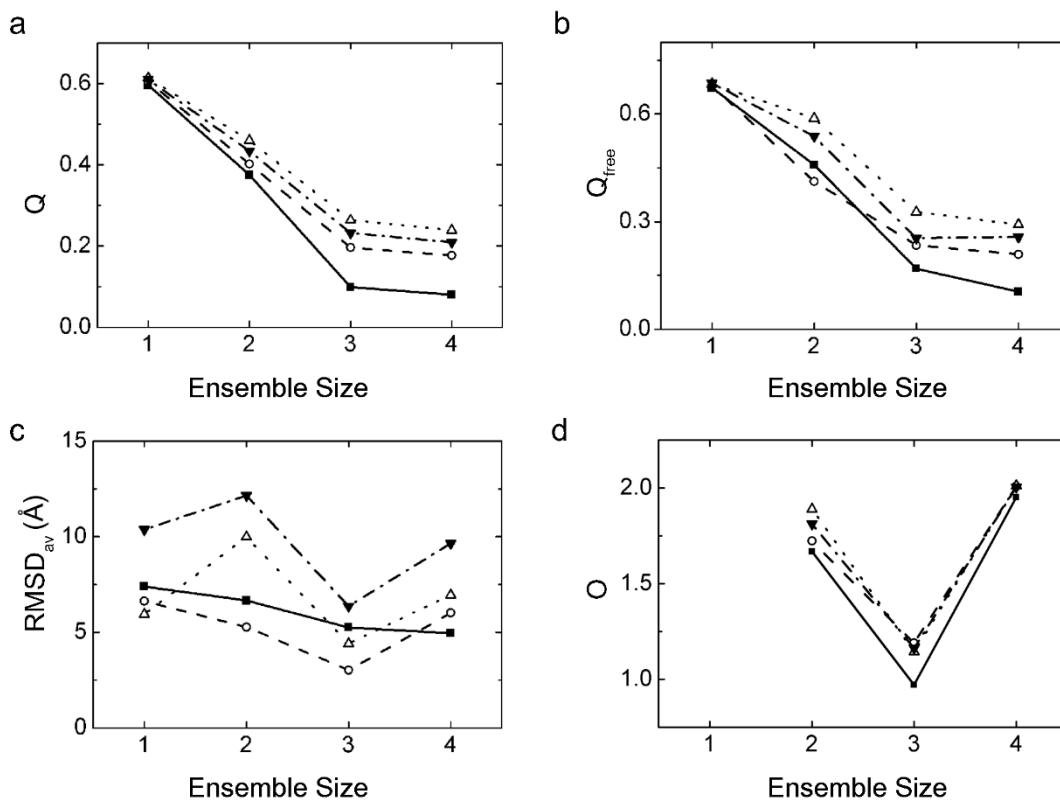

Figure S7. Dependences of  $Q$  (a),  $Q_{\text{free}}$  (b),  $\text{RMSD}_{\text{av}}$  (c), and  $O$  (d) factors on the ensemble size when each spin-label with 100 conformers was represented by three pseudo conformers. PRE data without error (■), with errors (○, Δ, ▼).

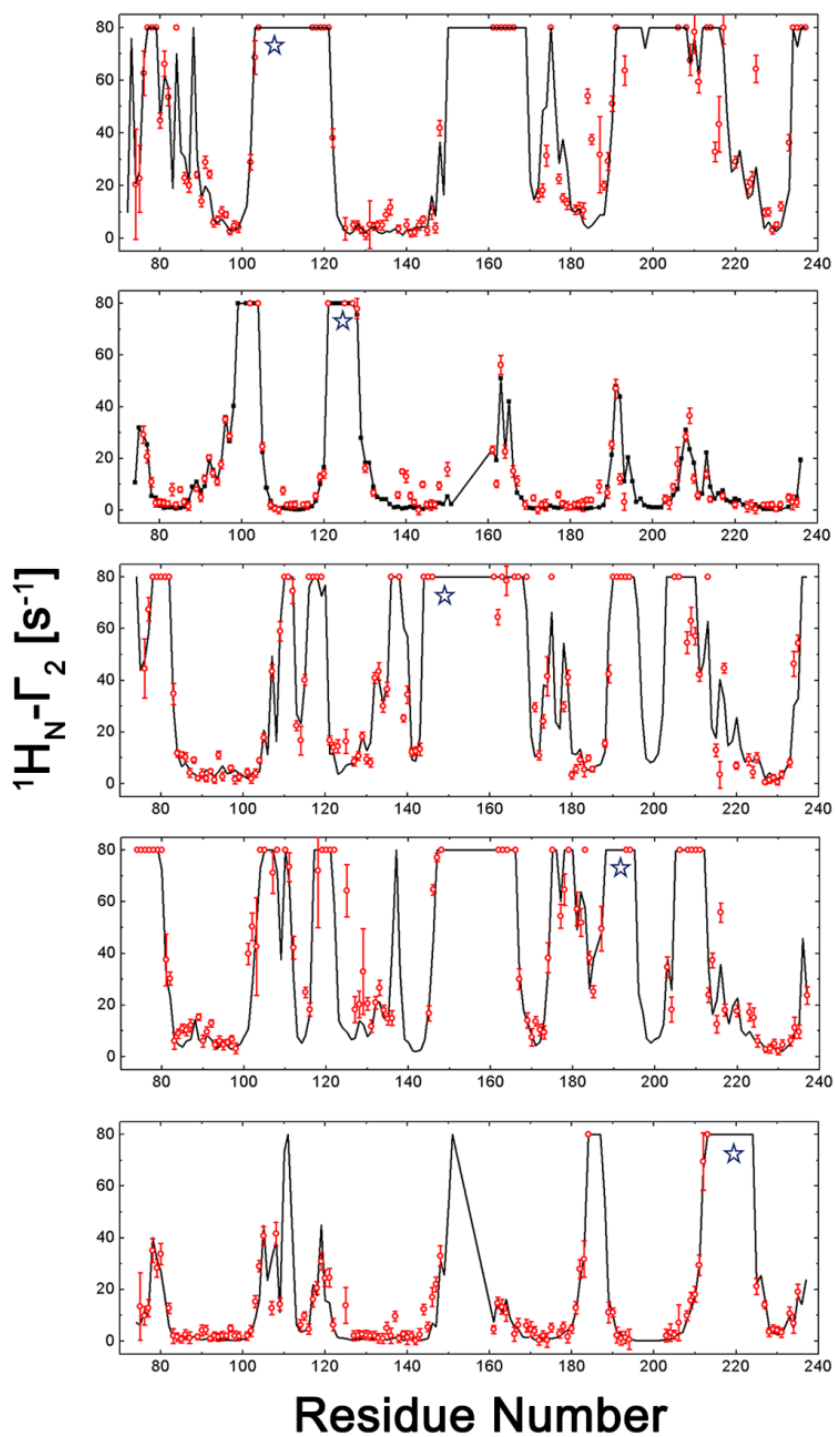

Figure S8. Comparison of experimental PRE data ( $\circ$ ) and calculated PRE data (black line). Spin labels are located at respective residues M107, H123, N148, S190, and N218, of which locations are indicated by stars. Data from residues in the linker (150-160) and flexible region in RRM2 (195-203) were not used in the calculations. The measurement errors are indicated by bars.

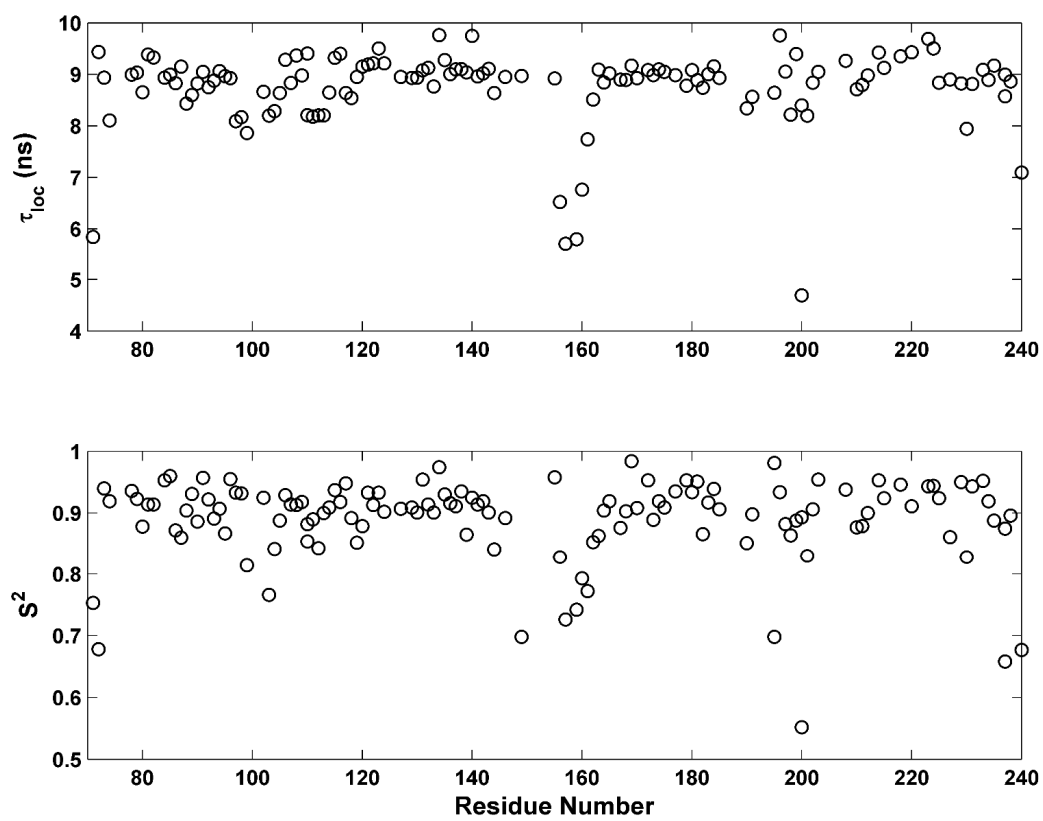

Figure S9. Localized correlation times  $\tau_{loc}$  (upper panel) and generalized order parameters  $S^2$  (lower panel) for PubRRM12 as measured at 25 °C.

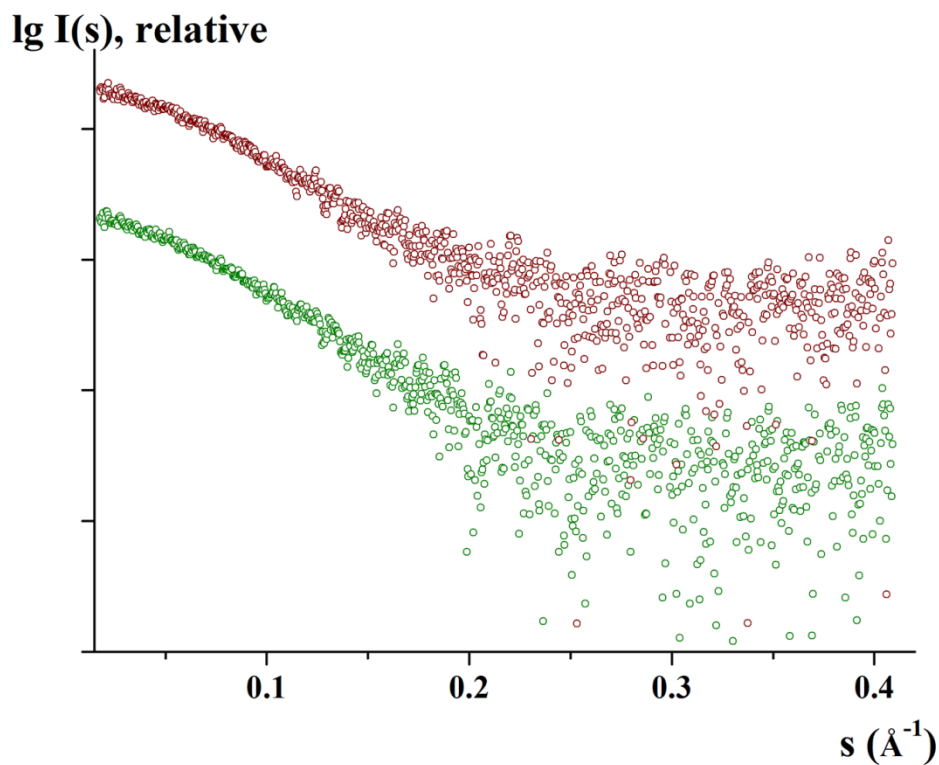

Figure S10. Comparison of SAXS data from wild type PubRRM12 (red dots) and a variant spin-labeled at N148 (green dots).

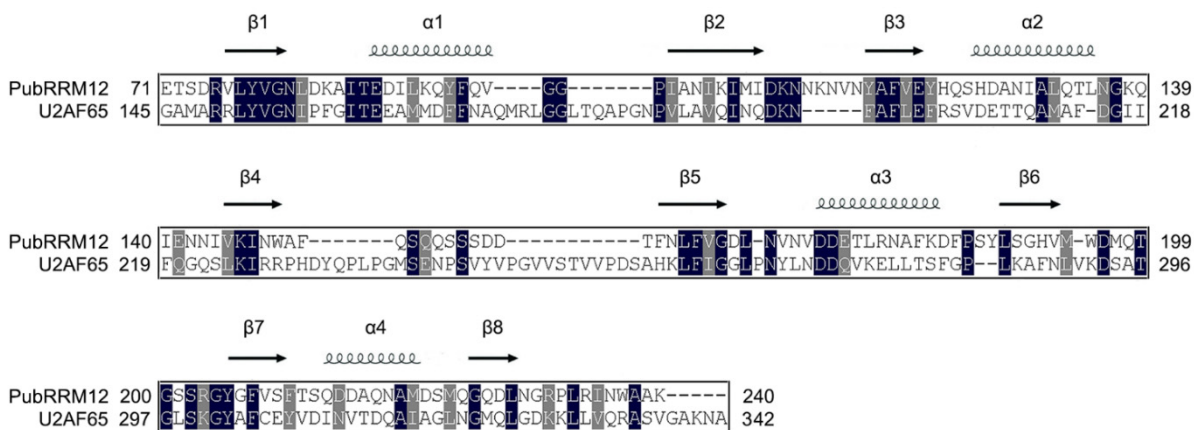

Figure S11. Sequence alignment and secondary structure of PubRRM12 and U2AF65.
